1  
2  
3  
4  
5  
6  
7  
8  
9  
10  
11  
12  
13  
14  
15  
16  
17  
18  
19  
20  
21  
22  
23  
24  
25  
26  
27  
28  
29  
30  
31  
32  
33  
34

**A novel method for generating 3D constructs with branched vascular networks using multi-materials bioprinting and direct surgical anastomosis**

*Xin Liu, Xinhuan Wang, Liming Zhang, Lulu Sun, Heran Wang, Hao Zhao, Zhengtao Zhang, Yiming Huang, Jingjinqiu Zhang, Biaobiao Song, Chun Li, Hui Zhang, Song Li, Shu Wang,\* Xiongfei Zheng,\* and Qi Gu\**

Dr. X. Wang, J. Zhang, Prof. Q. Gu  
State Key Laboratory of Membrane Biology, Institute of Zoology, Chinese Academy of Sciences, Beijing 100101, P. R. China  
E-mails: [qgu@ioz.ac.cn](mailto:qgu@ioz.ac.cn)

X. Liu, Prof. Q. Gu  
Savaid Medical School, University of Chinese Academy of Sciences, Beijing 100049, P. R. China

L. Zhang, Dr. H. Wang, Hui Zhang, Song Li, Prof. X. Zheng  
Shenyang Institute of Automation, Chinese Academy of Sciences, Shenyang 110169, P. R. China  
E-mails: [zhengxiongfei@sia.cn](mailto:zhengxiongfei@sia.cn)

Dr. H. Zhao, Dr. Y. Huang, Prof. S. Wang  
Institute of Chemistry, Chinese Academy of Sciences, Beijing, 100190 P. R. China  
E-mails: [wangshu@iccas.ac.cn](mailto:wangshu@iccas.ac.cn)

Dr. L. Sun, Z. Zhang, C. Li  
State Key Laboratory of Cell Biology, CAS Center for Excellence in Molecular Cell Science, Shanghai Institute of Biochemistry and Cell Biology, Chinese Academy of Sciences, Shanghai 200031, P. R. China

B. Song  
University of Science and Technology of China, Hefei, 230026, P. R. China

---

35 **Abstract**

36 Vessels pervade almost all body tissues, and significantly influence the  
37 pathophysiology of human body. Previous attempts to establish multi-scale vascular  
38 connection and function in 3D model tissues using bioprinting have had limited  
39 success due to the incoordination between cell-laden materials and stability of the  
40 perfusion channel. Here, we report a methodology to fabricate centimetre-scale  
41 vascularized soft tissue with high viability and accuracy using multi-materials  
42 bioprinting involving inks with low viscosity and a customized  
43 multistage-temperature-control printer. The tissue formed was perfused with branched  
44 vasculature with well-formed 3D capillary network and lumen, which would  
45 potentially supply the cellular components with sufficient nutrients in the matrix.  
46 Furthermore, the same methodology was applied for generating liver-like tissue with  
47 the objective to fabricate and mimic a mature and functional liver tissue, with  
48 increased functionality in terms of synthesis of liver specific proteins after *in vitro*  
49 perfusion and *in vivo* subperitoneal transplantation in mice. Moreover, to establish  
50 immediate blood perfusion, an elastic layer was printed wrapping sacrificial ink to  
51 support the direct surgical anastomosis of the carotid artery to the jugular vein. Our  
52 findings highlight the support extended by vasculature network in soft hydrogels  
53 which helps to sustain the thick and dense cellularization in engineered tissues.

54

55

56 **Key words:** 3D printing; multivascular network; low viscosity; GelMA; hUVEC

---

57 **1. Introduction**

58 Three-dimensional (3D) bioprinting techniques have significantly facilitated the  
59 process of fabrication of complex, heterocellular soft artificial tissues *in vitro*, which  
60 combine polymeric biomaterials and cells.<sup>[1-3]</sup> During the process of bioprinting, the  
61 bioinks provide protection to the cellular component, ensuring high cell viability,  
62 while also mimicking the extracellular matrix to promote bioactivity.<sup>[4-6]</sup> Although  
63 bioprinting technology has shown great potential in tissue engineering, the thickness  
64 of constructed tissues was limited to several hundred micrometers due to restricted  
65 oxygen and nutrient diffusion, which is integral in maintaining cell viability and  
66 proliferation.<sup>[7-8]</sup> In highly vascularized tissues, such as liver and kidney, the  
67 formation of new blood vessels is essential for growth beyond the diffusion limit.<sup>[9-10]</sup>  
68 Therefore, building multi-branched perfusable vascular networks is critical to the  
69 fabrication of thick tissue constructs.

70 Recent advances in 3D tissue fabrication have led to efficient bioprinting of blood  
71 vessels.<sup>[11-12]</sup> The strategies followed in these studies can be classified into two main  
72 groups: (i) scaffold-based approach, and (ii) scaffold-free bioprinting of vascular  
73 constructs.<sup>[13]</sup> The first approach can be divided into three major bioprinting  
74 modalities which include extrusion-based bioprinting, droplet-based bioprinting, and  
75 laser-based bioprinting.<sup>[14-15]</sup> Extrusion-based bioprinting enables fabrication of  
76 macro-vascular constructs (in the order of magnitude of a few centimeters), which  
77 allows printing with fugitive inks with subsequent remove for achieving a distinct  
78 vascular pattern. For demonstrating this method, water-soluble sugar ink was first

79 utilized.<sup>[16]</sup> The capillaries can be fabricated with diameters as small as 150  $\mu\text{m}$ .  
80 Recently, an interconnected vascular network that perfuses a centimeter-scale  
81 engineered osteogenic construct was generated.<sup>[17]</sup> The fugitive ink Pluronic F127 was  
82 dissolved, and endothelial cells (ECs) were used to create a vascular bed by seeding  
83 the channels. Alginate and gelatin have also been used as fugitive inks in recent  
84 studies.<sup>[18-20]</sup> However, cell-laden inks have the limitations of low cell viability (due to  
85 shear damage from ink extrusion) and exhibit poor resolution of the final vascular  
86 pattern formed (hundreds of micrometer voxels).<sup>[21-22]</sup> For scaffold-free bioprinting,  
87 cells encapsulated in hydrogels or decellularized matrix components could be used to  
88 fabricate micro-vascular network, which otherwise relies on ECs to form new vessel  
89 by physiological mechanisms.<sup>[23]</sup> Recently, pre-vascularized spheroidal assemblies  
90 with elaborate branching have been used to form vascular networks.<sup>[24]</sup> This proves  
91 that successful cellular assembly can be achieved after bioprinting by accelerated  
92 vascularization, which leads to the maturation of the tissue constructs.<sup>[14, 25]</sup>  
93 Furthermore, this method can mimic tissue regeneration and development; however,  
94 the vessels formed are limited in size and do not exceed the micrometer scale.<sup>[25]</sup>

95 The bioprinted tissue constructs with blood microvessels would eventually be  
96 implanted, and therefore they should be suitable for surgical anastomosis to the host  
97 vasculature after implantation.<sup>[26]</sup> Synthetic biodegradable microvessel microfluidic  
98 scaffolds provide sufficient structural support and have been successfully integrated  
99 with the host vasculature.<sup>[27-28]</sup> However, soft hydrogel with vascular networks lacked  
100 sufficient mechanical properties, which severely limited their utilization as a

101 load-bearing construct in tubular tissue regeneration.<sup>[16]</sup> So far, no research effort has  
102 been devoted to integration and implantation of hydrogel-based hollow vascular  
103 network into host vasculature. Some efforts have used sacrificial laser-sintered for  
104 constructing vascular networks, but this indirect printing method was detrimental to  
105 integrated bioprinting using multi-materials.<sup>[29]</sup> Therefore, we propose a method for  
106 bioprinting vasculature structure using elastic hydrogel and cell-laden hydrogel for  
107 enhanced mechanical support and biological activity. Cell-laden hydrogels may  
108 potentially decrease the damage during bioprinting and solidify in a cell-friendly  
109 environment, which may result in optimal cell proliferation and tissue remodeling.

110 In this study, we report the use of 3% GelMA with fibrin, as the cell-laden  
111 biomaterial for extrusion and bioprinting of vascularized tissue. With gelatin as  
112 fugitive inks, we printed HepG2 aggregates (HAs) with human umbilical vein  
113 endothelial cells (HUVECs) and mesenchymal stem cells (MSCs) as mixture to  
114 fabricate a vascularized hepatorganoid tissue (HOs), with proper endothelialization.  
115 Moreover, fabrication of functional 3D printed liver tissue with normal hepatocytic  
116 function was explored in this study, which involved probing liver-specific gene  
117 expression and albumin secretion *in vitro*, and *in vivo* subperitoneal transplanted in  
118 mice (**Figure 1A**). Furthermore, we leveraged this methodology combining 5%  
119 GelMA as inner elastic inks and external elastic inks to establish surgical anastomosis  
120 of the tissue, which has been rarely reported previously (Figure 1B).

121

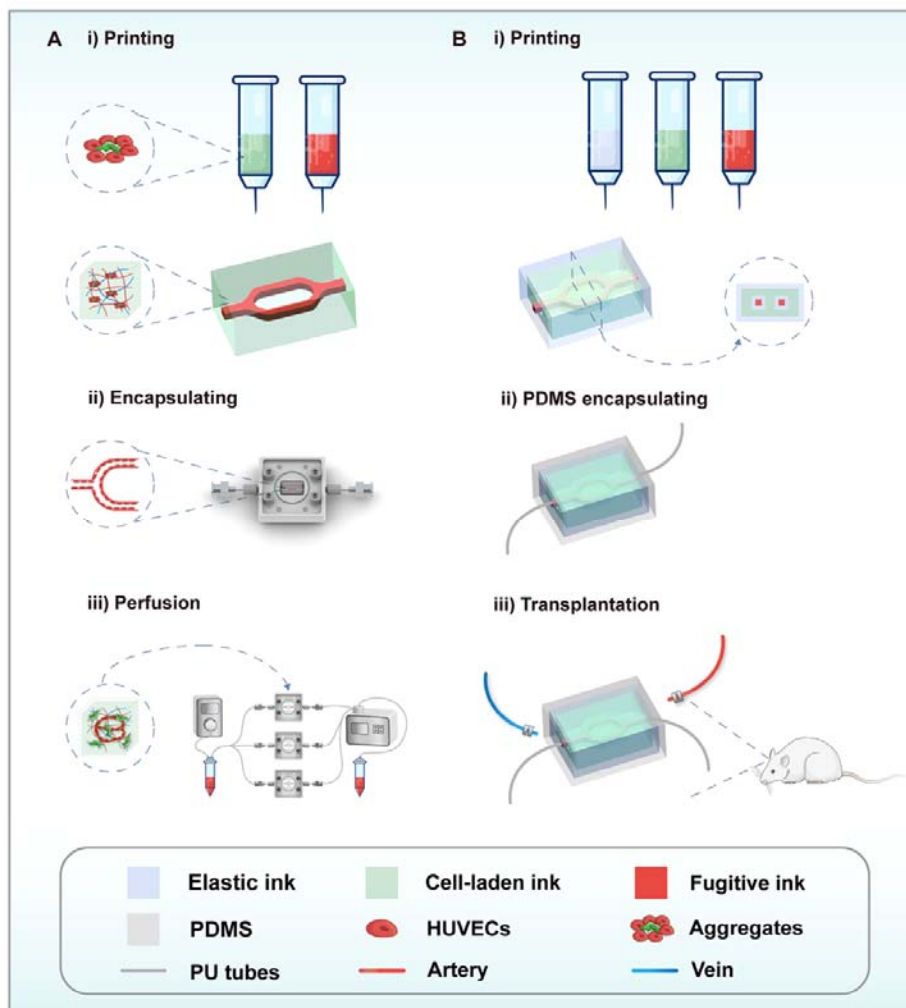

122

123 **Figure 1.** Schematic representation of multi-materials bioprinting strategies used in

124 this study. A) Multi-materials bioprinting was performed using cell-laden inks and

125 fugitive inks to fabricate 3D hepatic tissue with proper vascularization, and

126 hepatocytic function *in vitro*. B) Multi-materials bioprinting was performed using

127 cell-laden inks, fugitive inks, and elastic inks to fabricate tissue and optimal perfusion

128 was achieved *in vivo* by direct surgical anastomosis to host vasculature (artery to

129 vein).

130

---

131 **2. Results and Discussion**

132 **2.1. 3D printing of vascular constructs**

133 The viscosity of bioink is one of the important factors directly influencing the process  
134 of printing. When the viscosity of bioink is less (i.e. <5 Pa·s), the precision of printing  
135 is low. However, when the viscosity is high, it cannot protect cells from high shear  
136 stress of printing, which results in low cell survival rates.<sup>[30]</sup> Recent studies have  
137 demonstrated the suitability of GelMA hydrogels with low concentration (<5% w/v)  
138 to perform as cell-based bioinks due to their high cell stability and viability.<sup>[31-32]</sup> In  
139 this study, we evaluated the viscosity of GelMA under different temperature  
140 conditions (**Figure 2A**). When the GelMA concentration was 1% or 2%, its viscosity  
141 was close to zero and its properties were hardly affected by temperature. However,  
142 when the concentration was 3%, 4%, or 5%, its viscosity increased with the increase  
143 in GelMA concentration (at 5°C), which gradually decreased with the increase in  
144 temperature. However, when the temperature exceeded 25°C, the viscosity of GelMA  
145 approached zero. Moreover, the addition of 0.25% fibrin had no effect on the  
146 viscosity of GelMA. In order to visualize the change in viscosity of different  
147 concentrations of GelMA under different temperature conditions, the viscosity data  
148 were fitted to establish a three-dimensional heat map representing  
149 viscosity-temperature-concentration (**Figure 2B**). The red area represents the lower  
150 viscosity, and the blue area represents higher viscosity. For printability, 3% is the  
151 lowest concentration of GelMA with controllable viscosity at temperatures above  
152 zero.

153 GelMA is highly sensitive to temperature and light.<sup>[33]</sup> In order to achieve high  
154 precision, it is necessary to use GelMA in its printable phase and UV  
155 photocrosslinking was used after completion of the printing. The printable phase and  
156 UV crosslinking are two basic requirements for GelMA-based printing. The extrusion  
157 phase of GelMA recorded and the printing head (BiopHead) used in this study are  
158 shown in Figure 2C and Figure 2D. The gel point temperature  $T_0$  was measured from  
159 rheological tests (whereby storage modulus was equal to loss modulus). By setting the  
160 primary temperature of the printing head to be slightly higher than the gel point  
161 temperature  $T_0$ , the liquid phase of GelMA was maintained. The extrusion phase of  
162 GelMA was tested by adjusting the secondary temperature of the BiopHead. The  
163 extrusion phase of GelMA was analyzed through a high-speed camera (Figure 2D).  
164 GelMA remained in over gelation phase when the temperature was above  $T_0$ , with the  
165 extruded GelMA being distorted and irregular. GelMA remained in liquid phase when  
166 the temperature was below  $T_0$ , extruding the GelMA as a droplet at the tip of the  
167 needle. When the temperature condition was set correctly, the GelMA was in printable  
168 phase with the extruded GelMA being smooth with superior printing performance. As  
169 shown in Figure 2C and Figure 2E, the printability of low concentration GelMA is  
170 one of the goals of the experiment, and it is necessary to explore the printability of  
171 low concentration GelMA. Due to the temperature and light sensitive properties of  
172 GelMA, it is need to be cooled in the printhead to achieve pre-gel extrusion and  
173 molding, and the physical gelatinized construction is chemically crosslinked by UV  
174 lamps and cultures at 37°C to maintain shape accuracy. Therefore, the maintenance of



175 pre-gel state and purple diplomatic post-union structure are two basic requirements  
176 for GelMA. First, the extrusion status of the GelMA was recorded. The printhead used  
177 in the test was shown in Figure 2D. The gel point temperature  $T_0$  (the storage modulus  
178 is equal to loss modulus) was measured based on the rheological properties of bioink.  
179 The liquid state of the bioink in the print silo was maintained by setting the first stage  
180 temperature of the printhead slightly higher than the gel point temperature  $T_0$ . The  
181 extrusion state of the bioink was tested by adjusting the secondary temperature of the  
182 printhead. The green circle in the figure represents the pre-gel state of the bioink.  
183 Secondly, the maintenance effect of the construction after the purple couplet was  
184 tested. When the concentration of GelMA is lower than 2%, the printing requirements  
185 in the state of physical gel could be achieved by lowering the temperature. However,  
186 the structure of the chemical crosslink will melt and collapse in the environment of  
187 37°C, which could not meet the stability requirements. The solidification and forming  
188 effect of bioink in the blue area of the test diagram is better. The above experimental  
189 results show that the concentration and temperature parameters of bioink in the pink  
190 range of the map are printable regions.

191 Figure 2C and Figure S1 show the BiopHead printing system used in the  
192 experiment, which includes air-driven silo, electric-driven silo, primary temperature  
193 control device, secondary temperature control device, and a cooling system.  
194 BiopHead can achieve a temperature gradient through a two-stage temperature control  
195 system, which allows the bioink in the printing silo to be in a liquid phase, and remain  
196 in a printable phase in the printing needle. BiopHead can run in two extrusion modes,

197 namely the electric extrusion mode and the pneumatic extrusion mode. Electric  
198 extrusion is based on volume change. In this mode, direct-current motor drives the  
199 screw structure to rotate, which in turn drives the push rod (the pushing device behind  
200 the syringe) to move linearly. The underlying reason for the high precision in the  
201 electric extrusion mode is the precision of the screw displacement. It is difficult to  
202 achieve high-precision control of the print volume when the viscosity of the bioink is  
203 low, i.e., the bioink is in a thin state. Also, since the print silo of the electric extrusion  
204 is smaller, the displacement of the push rod has less influence on the extrusion  
205 volume. The pneumatic extrusion is based on pressure change. The pressure of the  
206 rear end of the silo is changed by an air compressor (cylinder) which causes the  
207 extrusion of the bioink. In the pneumatic extrusion mode, the volume extruded is  
208 larger, which makes it ideal for large-volume printing. Controlling the pressure of the  
209 ink is difficult, hence, printing accuracy is not guaranteed. Therefore, electric  
210 extrusion is used for high-precision printing, while pneumatic extrusion is used for  
211 large-scale printing involving larger volumes (e.g. <5 ml). In this study, GelMA was  
212 printed using an electric drive, and the temperature control system was adjusted to  
213 maintain the bioink in the gel state. The temperature of the printing silo was  
214 controlled by the primary temperature control system to keep bioink in the printing  
215 silo in liquid phase. The temperature of the printing needle was controlled by the  
216 secondary temperature control system to maintain the bioink in a printable phase  
217 suitable for printing. The extrusion state of the bioink was captured by a high-speed  
218 camera. When the temperature was too low, the bioink was in over gelation phase.

219 When the temperature was too high, the bioink was in a liquid phase, and when the  
220 temperature conditions were right, the bioink was in a printable phase.

221 To engineer and fabricate vascularized tissue constructs, several channel  
222 configuration structures were designed. First, one straight channel within a matrix was  
223 designed, which was printed with both cell-laden inks and sacrificial inks Figure 2F.  
224 The cell-laden inks and fugitive inks were printed on a glass substrate with  
225 dimensions of 9.6 mm × 4 mm × 2 mm. Next, photocrosslinking was achieved by  
226 exposing the printed constructs to UV light for 2 mins. Then, the fugitive ink was  
227 removed from the thick tissue by heating to ~37°C, whereby it undergoes a  
228 gel-to-fluid transition. Furthermore, we printed several different constructs to  
229 demonstrate the formation of stable vascularized tissues, including a  
230 one-to-two-channeled structure Figure 2G, a one-to-four-channeled structure Figure  
231 2H, a one-to-two-to-four-channeled 3D structure Figure 2I, and a  
232 one-to-four-channeled 3D structure Figure 2J.

233

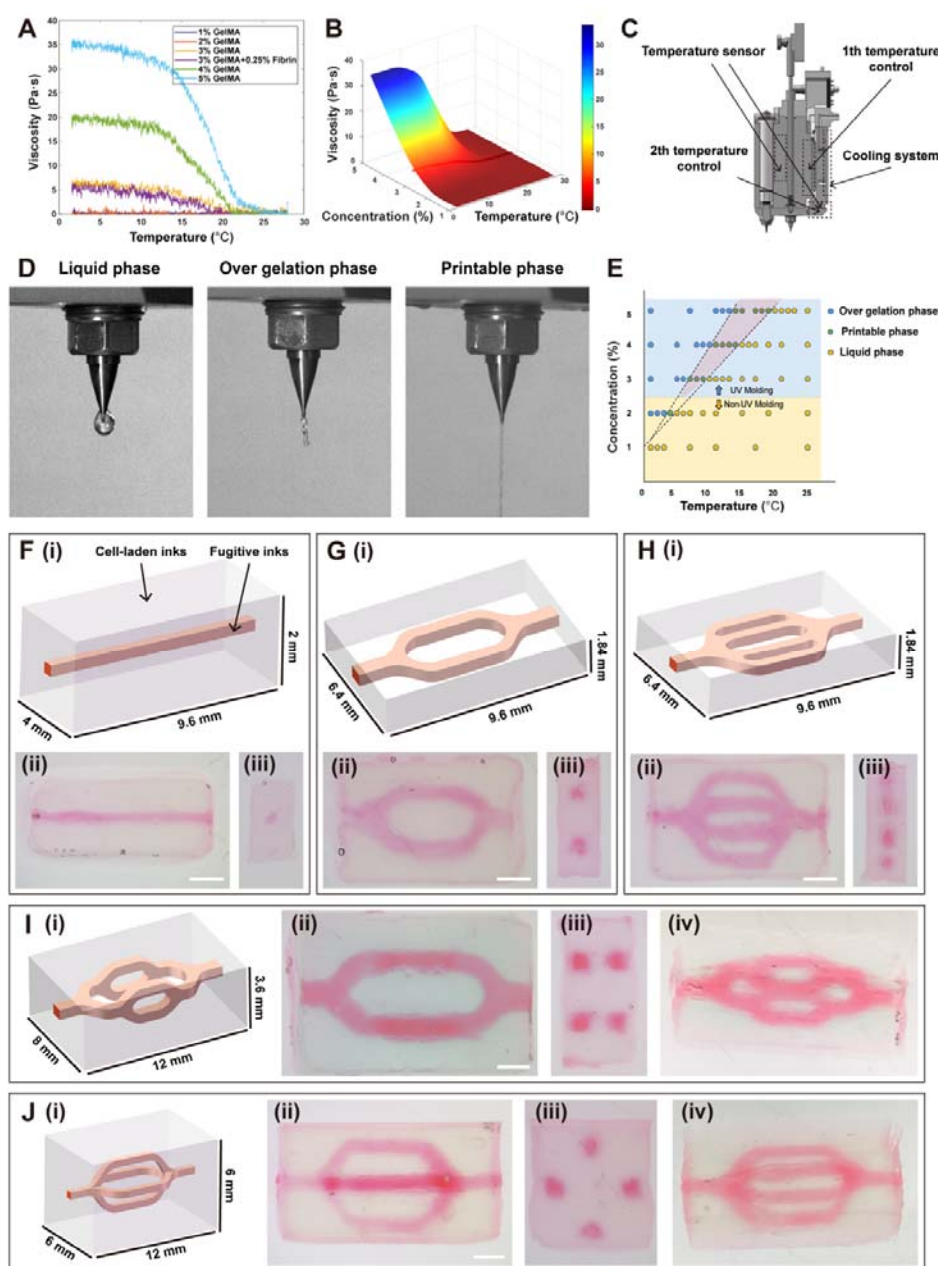

234

235 **Figure 2.** A) Viscosity test indicating the viscosity of GelMA and GelMA-fibrin at  
 236 different concentrations. B) Three-dimensional graph indicating viscosity-temperature  
 237 of GelMA and GelMA-fibrin at different concentrations. C) Visual representation of  
 238 the printing system. D) Extrusion state of GelMA at different concentrations and

239 temperatures, showing liquid phase, over gelation phase, and printable phase at  
240 different temperatures. E) Graphical representation of the extrusion state of GelMA at  
241 different concentrations and temperatures showing the printable region. F-J)  
242 Schematic illustrations and optical images of different constructs printed using  
243 transparent ink along with cell-laden ink, red ink along with fugitive ink, respectively.  
244 (i) schematic illustrations, (ii) top view, (iii) side view, (iv) stereogram. Scale bar  
245 represents 1 mm.

246 **2.2. Characterization of GelMA-fibrin (GF) hydrogels and assessment of the**  
247 **extent of formation of capillary-like network**

248 GelMA was synthesized using methacrylic anhydride (MA) to enable  
249 photo-crosslinking (**Figure 3A**).<sup>[33]</sup> To verify the percentage of functionalized  
250 methacrylation groups, <sup>1</sup>H NMR was used to measure the extent of free amine group  
251 substitution (Figure S2, Supporting Information). The results demonstrated 70%  
252 methacrylation of gelatin. Previous studies have shown that GelMAs have  
253 integrin-binding motifs and matrix metalloproteinase sensitive groups for cells  
254 adherence and migration.<sup>[34-35]</sup> Several successful attempts have been made in  
255 generation of functional vascular networks using GelMA.<sup>[36-38]</sup> On the other hand,  
256 fibrin gels have exhibited better angiogenic sprouting and capillary lumen formation  
257 with human umbilical vein endothelial cells (HUVECs).<sup>[39-40]</sup> In order to combine the  
258 optimal printing properties of GelMA and the angiogenic properties of fibrin, we used  
259 cell-laden inks composed of GelMA and fibrin blends (Figure 3B). Specifically, these  
260 materials form a GelMA-fibrin matrix crosslinked by dual-crosslinkers. Thrombin is

261 used to rapidly polymerize fibrinogen, whereas lithium  
262 phenyl-2,4,6-trimethylbenzoylphosphinate (LAP) as a photo-initiator for GelMA  
263 crosslinking. There are three steps in the formation of the GelMA-fibrin matrix. First,  
264 GelMA and fibrinogen undergo a liquid-to-gel transition as the temperature decreases.  
265 Second, after UV irradiation exposure, the GelMA is rapidly crosslinked into a gel.  
266 The third step involves fibrinogen polymerization into fibrin to form GelMA-fibrin  
267 matrix upon submerging into thrombin solution.

268 The microstructures of the hydrogels were observed using scanning electron  
269 microscopy (SEM). Micrographs of the GelMA-fibrin blends at different percentage  
270 ratios after incubation at 37°C for 3 days have been presented in Figure 3C. As  
271 expected, after adding fibrin, the matrix formed a crosslinked interpenetrating  
272 polymer network (IPN).<sup>[41]</sup> To ensure the appropriate biocompatibility, 3% GelMA  
273 (3G) and 5% GelMA (5G) were selected as the base, and different concentrations of  
274 fibrin solutions were introduced into this base solution. The SEM micrographs  
275 revealed that the average size of interconnected pores increased with lowering of the  
276 GelMA concentration (Figure 3C). The average size of pores increased with lowering  
277 of the concentration of the GelMA used, and decreased after the addition of fibrin  
278 (Figure 3E). The porous structure may facilitate nutrient diffusion and improve cell  
279 survival. Besides, fibrin fibers were interpenetrating the structure of the GelMA.

280 Previous studies have shown that the presence of MSCs is crucial for the  
281 formation of capillary networks.<sup>[36]</sup> It was found that the presence of MSCs induced  
282 the HUVECs to form HUVEC-networks. To assess the appropriate biocompatibility,

283 RFP-HUVECs and GFP-MSCs were co-encapsulated in a GF matrix and the extent of  
284 capillary-like network formation was quantified using confocal microscopy (Figure  
285 3D). Those images clearly reveal that 3% GelMA+0.25% fibrin (3GF) has higher  
286 total network length and number of branch points than 5% GelMA+0.25% fibrin  
287 (5GF), and 3% GelMA+1% fibrin (3G+1F), respectively (Figure 3F, G; Figure S3 and  
288 Movie S1, Supporting Information). These HUVEC-networks were well established,  
289 with the majority of them forming cord-like structures. Three-dimensional confocal  
290 reconstructed images showed the presence of MSCs adjacent or proximal to the  
291 capillary structures, suggesting that the MSCs were differentiating into perivascular  
292 cells. It also indicates that 3G is more biocompatible than 5G. Moreover, 3% GelMA  
293 consistently generated more robust, interconnected vascular networks with 0.25%  
294 fibrin than with 1% fibrin. The formed capillary-like structures in hydrogel were  
295 further investigated by SEM. The formed capillary-like structures in 3GF were found  
296 to be more abundant and longer than those in 3G or 5GF, which reinforced the  
297 findings of the confocal microscopy. Besides, the fiber structure of the hydrogel near  
298 the capillary was partially destroyed, which may be due to the degradation of the  
299 basement membrane and extracellular matrix by the secreted matrix metalloproteinase  
300 (MMP). Hence, 3GF was chosen to be the cell-laden ink of choice pursued in the  
301 remaining part of the study. The schematic diagram in Figure 3H presented GelMA  
302 and fibrin crosslinked IPNs is based on the obtained results, and depicts HUVECs and  
303 MSCs in hydrogels of different compositions.

304

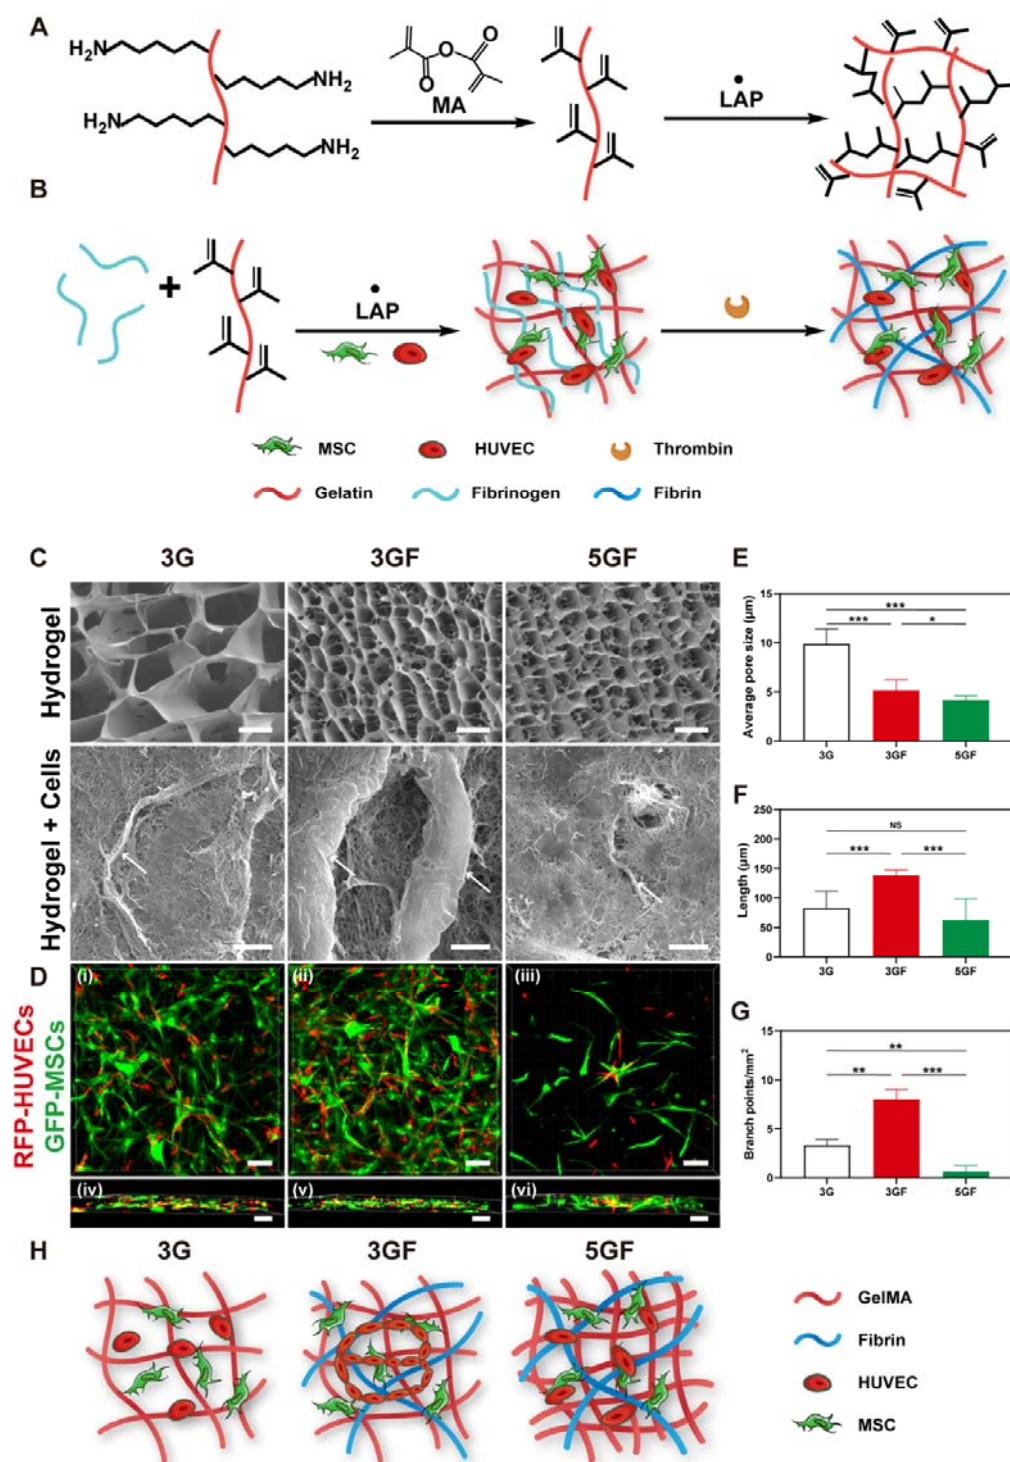

305

306 **Figure 3.** Characterization of GF hydrogels and results depicting the extent of

307 capillary-like network formation. A, B) Schematic diagram depicting GelMA



308 synthesis (A), and steps involved in cell-laden ink, GF ink formation (B). C) SEM  
309 images of GelMA or GelMA-fibrin hydrogels with different compositions bearing  
310 RFP-HUVCEs and GFP-MSCs. Scale bar represents 10  $\mu\text{m}$ . D) Representative (i-iii)  
311 3D reconstruction of constructs and (iv-vi) Z-plane cross-section from confocal  
312 microscopy images showing capillary-like network formation. Scale bar represents  
313 100  $\mu\text{m}$ . E, F) Quantitative analysis of the length (E), and branching points (F) in  
314 capillary-like network. G) Graphical representation of morphological parameters of  
315 HUVECs and MSCs in different percentages of GelMA-Fibrin IPN. The data are  
316 presented as the mean  $\pm$  SD. \*:  $p < 0.1$ , \*\*:  $p < 0.01$ , \*\*\*:  $p < 0.001$ .

317

### 318 **2.3. Tissue perfusion culture and aggregate printing for vascular network**

#### 319 **formation *in vitro***

320 In order to provide stable perfusion for long-term culture, we fabricated a continuous  
321 flow perfusion system (**Figure 4A**; Figure S4A, Supporting Information). The system  
322 includes an incubator, a built-in digital-control peristaltic pump, and a reservoir of  
323 culture medium. The designed perfusion chamber (Figure 4B) consisted of three  
324 components: a flow part and top and bottom parts. The first one was used for fixing  
325 needles, and the top and bottom parts were made of glass which can hold the printed  
326 tissue and enabled real-time observation. Before printing, the top and flow parts were  
327 assembled respectively, and the flow part contained needle holes for establishing  
328 connection with the media perfusion system.

329 To confirm tissue culture capability, we co-printed cell-laden fugitive inks with  
330 simple “one-to-two” channeled tissue as described above, with the hydrogels being  
331 printed on a specially-designed flow chamber. A 10% GelMA solution was prepared  
332 at 37°C and used as elastic ink to fully encapsulate the printed features in the flow  
333 chamber, and this was followed by photopolymerization to cross-link the GelMA.  
334 Next, the fugitive inks were liquefied and removed from the 3D construct. The flow  
335 chamber connected with inlet and outlet tubes through luer connector perfusion  
336 system with pumps. Red pigment was added to the medium for coloration (Figure 4C).  
337 We used 1.6-mm-inner-diameter tubes and set the inlet perfusion rate at 2-20  $\mu\text{L min}^{-1}$   
338 for stable and perfusable culture. Importantly, over the course of 7 days of perfusion,  
339 the channels always maintained an integrity pattern (Figure 4D; Figure S4B and  
340 Movie S2, S3, Supporting Information).

341 For developing viable strategies for vascularization in tissue engineering, we  
342 must carefully explore cell morphology for ensuring high biocompatibility. While cell  
343 aggregate cultures hold tremendous potential due to their organotypic cellular  
344 interaction, it is easy to improve their viability and function when compared with  
345 single cells.<sup>[42-45]</sup> A previous study has reported the capability of fibroblast aggregates  
346 to induce vascularization.<sup>[24]</sup> We developed aggregates prepared by co-culturing 80%  
347 HUVECs and 20% HFFs. It was observed that the HUVECs in the co-culture  
348 aggregates assembled to form a vessel-like structure. To fabricate more engineered  
349 and vascularized tissues, we used RFP-HUVECs and HFFs co-culture aggregates  
350 encapsulated in 3GF inks with gelatin as the fugitive inks. As indicated previously, we

351 initially fabricated the “one-to-two” channeled tissues with HUVECs and MSCs (VOs)  
352 shown in Figure 4E. Also, HUVEC and MSC as single cell were encapsulated in 3GF  
353 and printed for comparison. To investigate the viability of both single cells and cell  
354 aggregates in perfusion culture after 1 days, 4 days and 7 days, we used calcein AM  
355 and EthD for staining and confocal imaging, while Image J was used for statistical  
356 analysis of data (Figure 4F, G, H; Figure S5, Supporting Information). At day 1, the  
357 cell viability was 66% for aggregates. However, the values increased to 71% and 80%  
358 at day 4 and day 7, respectively. It was found that printed single cells had no more  
359 than 40% viability after 7 days. We found that the initial cell viability was lower  
360 compared with that at day 7, suggesting that the printed cells proliferated over time.  
361 The observations suggest that our 3D bioprinting approach to printed HUVEC  
362 aggregates is less destructive than that observed in single cell.

363 To demonstrate the formation of vascularized tissues, we used HUVECs and  
364 HFFs co-culture aggregates. After a 3-day culture of printed cellular aggregate  
365 incubation with 3GF hydrogels, morphological assessment for vascularization and  
366 lumen formation was performed (Figure 4I, Movie S4, Supporting Information).  
367 Additional network vascularization was studied using 3D-reconstructed confocal,  
368 whereby the printed tissues showed multiple cellular aggregates forming  
369 capillary-like networks. This observation suggests that those aggregates were  
370 important for the formation of vascularized networks *in vitro*. Furthermore, to form  
371 vasculature channels, we lined HUVECs in the printed channels of VO. After  
372 overnight perfusion, HUVECs attached to each vessel (Figure 4J). Moreover, it

373 formed a confluent monolayer after one week of culture incubation. It is important  
374 that angiogenic HUVEC-based invasions occurred in the vascular channel, with  
375 sprout formation bearing lumen-like structures. Although the morphology of the  
376 budded sprouts is in its preliminary stages, the exciting perspective is the formation of  
377 connections between sprout tips and the HUVEC aggregates. We have demonstrated  
378 using SEM the morphology of HUVECs and MSCs encapsulated in 3GF, whereby the  
379 attached HUVECs and HUVEC-based aggregates have been shown after different  
380 time periods of incubation (Figure. 4K, L).

381

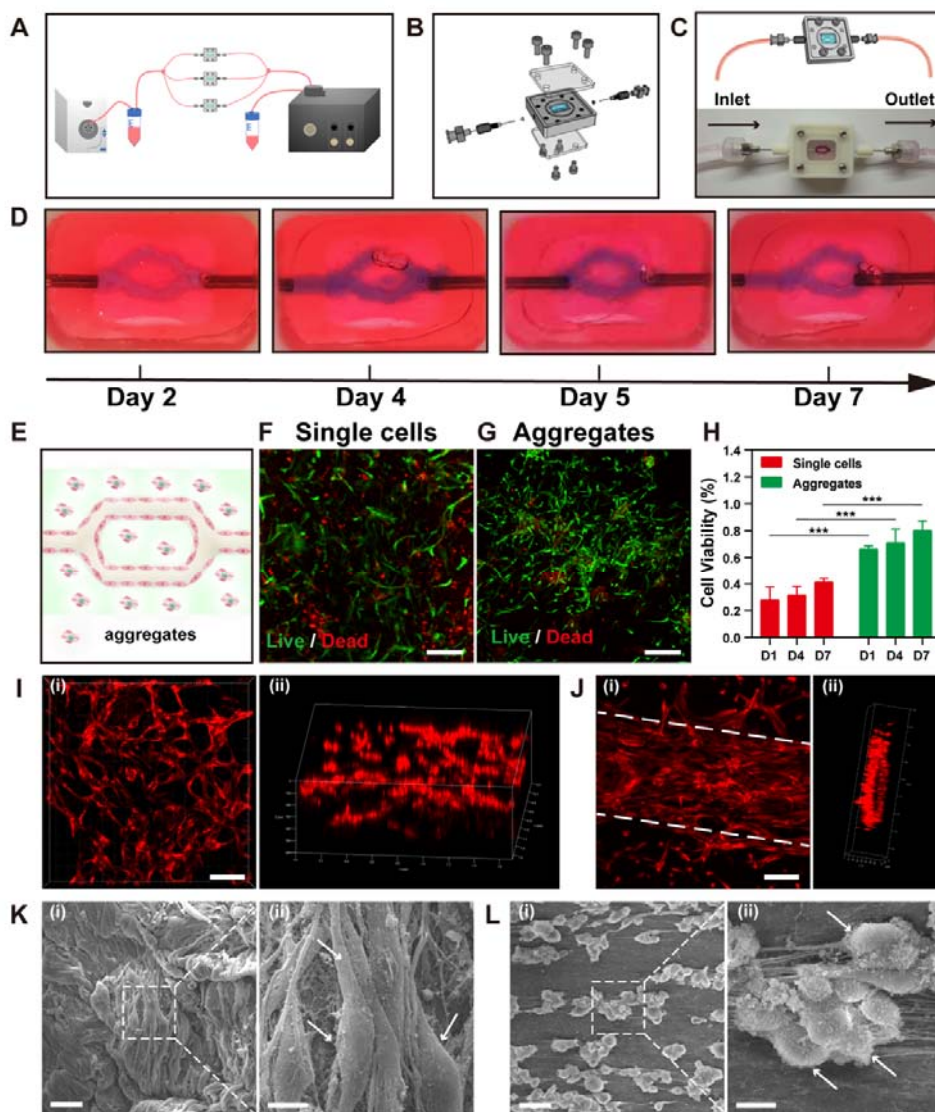

382

383 **Figure 4.** Tissue perfusion culture and aggregate printing for vascular network

384 formation *in vitro*. A) Schematic diagram of perfusion equipment showing

385 digital-control peristaltic pump, reservoir of culture medium, and perfusion chambers

386 containing printed tissues. B) Perfusion chamber schematic diagram showing flow

387 parts, top and bottom glass, luer connector, needles, screw, and sealing ring. C)

388 Schematic diagram showing flow chamber and PU tube-based connections. D) VOs

389 perfused in one week. Images show channel perfusion on days 2, 4, 5, and 7,

390 respectively. E) Schematic diagram showing HUVEC and MSC co-culture aggregates  
391 mixed with GF inks printed as VOs. F) Live/dead fluorescence images showing  
392 HUVECs and MSCs co-culture aggregates. Scale bar represents 200  $\mu\text{m}$ . G)  
393 Live/dead fluorescence images showing co-printed HUVECs and MSCs. Scale bar  
394 represents 200  $\mu\text{m}$ . H) Cell viability assay results of printed HUVECs and MSCs  
395 co-printed compared with HUVECs and MSCs co-culture aggregates on days 1, 4 and  
396 7 after printing. I) Fluorescence composite images of (i) top view and (ii)  
397 cross-section displaying vascularized cells in printed GF inks. Scale bar represents  
398 200  $\mu\text{m}$ . J) Fluorescence composite images of (i) top view and (ii) cross-section  
399 displaying RFP-HUVECs seeded in printed channels and perivascular cells. Scale bar  
400 represents 200  $\mu\text{m}$ . K) SEM images showing HUVECs and MSCs co-cultures in GF  
401 inks after printing. (i) Scale bar represents 20  $\mu\text{m}$ . (ii) Scale bar represents 10  $\mu\text{m}$ . L)  
402 SEM images showing HUVECs attached in channels. (i) Scale bar represents 20  $\mu\text{m}$ .  
403 (ii) Scale bar represents 10  $\mu\text{m}$ . The data are presented as the mean  $\pm$  SD. \*:  $p < 0.1$ , \*\*:  $p < 0.01$ , \*\*\*:  $p < 0.001$ .

405

#### 406 **2.4 Fabricating vascularized liver tissues as *in vitro* model and its implantation *in*** 407 ***vivo***

408 Previously, it has been shown that a vascularized tissue environment is preferred due  
409 to its better cell-cell interactions, and improved hepatocytic function. In this study, in  
410 order to fabricate liver models *in vitro*, we encapsulated HAs by replacing  
411 HUVEC-based aggregates within the cell-laden hydrogel. HepG2 is a cancer cell line,

412 which has been used as a model cell for tissue regeneration *in vitro* for studying  
413 hepatic function.<sup>[46-48]</sup> For HepG2 aggregate formation, 60% HepG2, 30% HUVECs,  
414 and 10% HFFs were mixed, and this was based on the percentages of the different cell  
415 types as observed *in vivo*. To confirm the distribution of the three cell types  
416 throughout the aggregate, their 3D distribution was assessed using confocal  
417 fluorescence microscopy (**Figure 5B**). Notably, after 2 days of incubation, the  
418 aggregates' diameters were about 200  $\mu\text{m}$  and showed albumin (ALB) expression  
419 (Figure 5B). Importantly, we printed multi-HAs as shown in Figure 5C, the ALB  
420 expression increased after 7 days of perfusion culture *in vitro*. This difference was  
421 possibly due to better nutrition and oxygen support in the tissue.

422 It is observed that HUVECs in multi-HAs do not form connections with each  
423 other. Thus, we encapsulated HUVECs, MSCs, and HAs into the matrix hydrogel to  
424 generate more vascularization in the tissue. Here, the HUVECs and MSCs were  
425 mixed in appropriate ratios. HUVECs and MSCs were seeded at  $1 \times 10^7$  cells  $\text{mL}^{-1}$  and  
426  $1 \times 10^6$  cells  $\text{mL}^{-1}$ , respectively. Judging from the 3D-reconstructed confocal images,  
427 the printed tissues showed formation of capillary-like networks by HUVECs and  
428 MSCs along with formation of multiple cell-aggregates (Figure 5D, Movie S5,  
429 Supporting Information). This suggests that HUVECs and MSCs single cells, as well  
430 as HAs are important for the formation of vascularized liver tissues *in vitro*. To  
431 evaluate the liver function of this tissue, we assessed the expression of hepatic  
432 specific genes by quantitative PCR (qPCR) analysis at different periods of culture  
433 (Figure S6). It is notable that ALB and hepatocyte nuclear factor 4 alpha (*HNF4A*)

434 expression levels were increased and reached peak values after 2 weeks of culturing,  
435 and the human alpha 1-antitrypsin (AAT) expression was at its highest level at day 4.  
436 However, *ASGPR1* and *CK18* expression levels decreased, while the liver tissue  
437 *CK18* expression level was lower than that in two-dimensional (2D) culture of HepG2  
438 cells. Compared with 2D HepG2 culture, only HepG2 (Hs) and HAs are printed in the  
439 tissue, while the HO expressed the highest levels of *ALB*, *ASGPR1*, *PROX1*, *AAT*,  
440 *CEBPA* and *CD31* (Figure 5A). Liver function-related protein expression of ALB  
441 between different culture periods was assessed using ELISA (Figure 5E). ALB  
442 secretion was the highest after culturing for 6 days, gradually declining thereafter.  
443 Thus, liver tissue cultured for 7 days was chosen for further experiments.

444 To analyze the functionality of vascularized liver tissues *in vivo*, we implanted  
445 HOs subperitoneally in mice. We chose 3GF hydrogel as the control. To avoid  
446 immunological rejection, after liver tissue transplantation, we injected cyclosporine  
447 into the abdominal cavities of the mice. The blood vascular system is a critical system  
448 for nutrients and oxygen supply. The liver tissue transplants showed  
449 neovascularization at day 7 after transplantation (Figure 5F). However, this  
450 phenomenon could not be observed in the 3GF hydrogel treated test group.

451 To demonstrate that these tissues can be used for direct surgical anastomosis to  
452 host vasculature, we leveraged this “one-to-two” channeled tissues combining 5%  
453 GelMA as inner elastic inks and external elastic inks outside fugitive inks and  
454 cell-laden inks respectively, encapsulated in poly(dimethylsiloxane) (PDMS) were  
455 connected to the arteria vessel of adult SD rats, in artery-to-vein mode. The tissues



456 were connected using PU tubes after PDMS-based encapsulation (Figure 5G, Movie  
457 S6, Supporting Information). These inlet, outlet PU tubes were connected to the  
458 carotid artery and jugular vein, respectively (Figure 5H, Movie S7, Supporting  
459 Information). The PU tubes have been shown to be antithrombotic in *in vivo* vascular  
460 grafts. To prevent blood clotting in the PU tubes, the animals were injected with  
461 heparin during surgery, as well as within 4 days after the surgery. After the  
462 vasculature connection being established, the arterial clip was removed to allow blood  
463 perfusion. Although this mode was technically challenging owing to the high pressure,  
464 the “one-to-two” channel in the hepatic tissue was maintained. One week after the  
465 implantation, thrombus was observed and the tissue was removed.

466

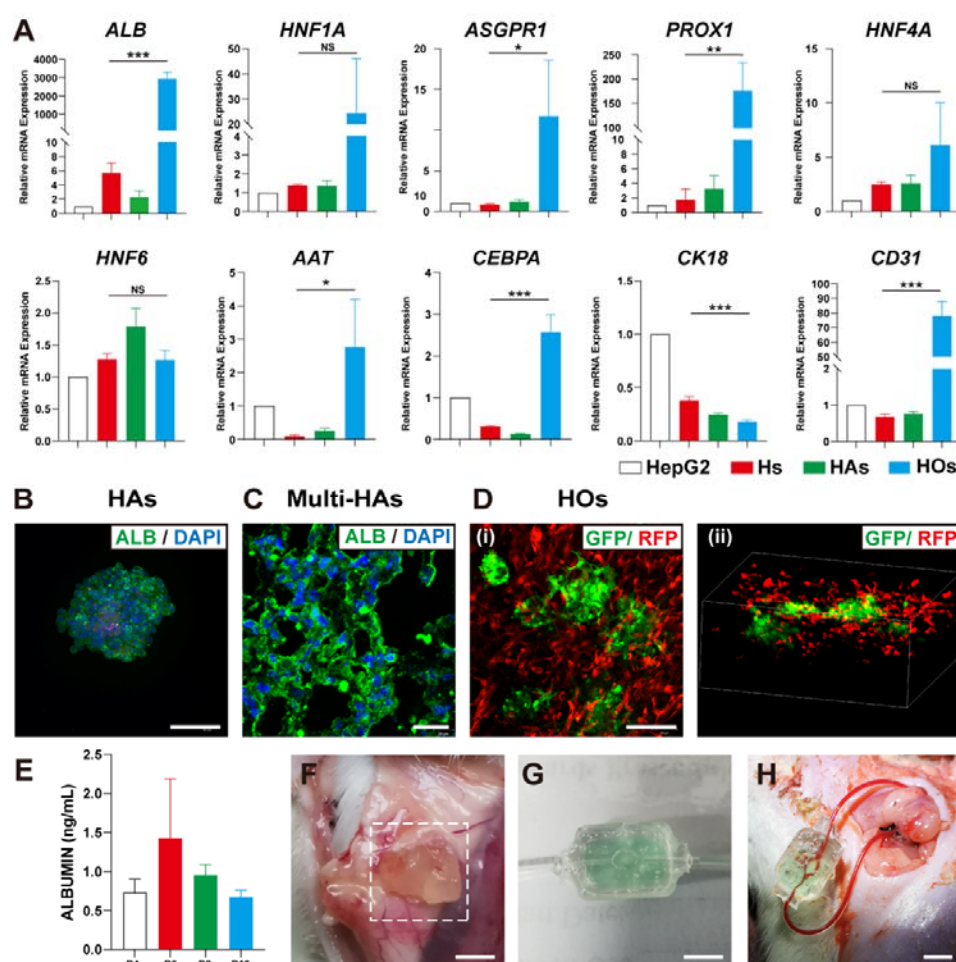

467

468 **Figure 5.** *In vitro* and *in vivo* fabrication of vascular liver. A) Quantitative PCR  
 469 analysis of the hepatic markers (*ALB*, *HNF1A*, *ASGPR1*, *PROX1*, *HNF4A*, *HNF6*,  
 470 *AAT*, *CEBPA*, *CK18*), and the vascular marker (*CD31*). B) Fluorescence images of the  
 471 HAs and multi-HAs showing ALB expression. Scale bar represents 100  $\mu$ m. C)  
 472 Fluorescence images of multi-HAs showing ALB expression. Scale bar represents 50  
 473  $\mu$ m. D) Fluorescence images of HOs displaying HAs formed by GFP-HepG2,  
 474 RFP-HUVECs, and RFP-HUVECs vascularization. Scale bar represents 200  $\mu$ m. E)  
 475 ALB expression in cell culture supernatants of HOs as measured by ELISA. F)

476 Observation of transplanted tissues under the subperitoneal zone showing  
477 neovascularization of the liver tissue transplants. Scale bar represents 1 cm. G)  
478 Images showing “one-to-two” channeled tissues encapsulated in PDMS connected  
479 with PU tubes. Scale bar represents 1 cm. H) Observation of transplanted tissues after  
480 establishment of connections with carotid artery and jugular vein showing arterial clip  
481 slip and establishment of blood perfusion. Scale bar represents 1 cm. The data are  
482 presented as the mean  $\pm$  SD. \*:  $p < 0.1$ , \*\*:  $p < 0.01$ , \*\*\*:  $p < 0.001$ .

483 In this study, we present a facile multi-materials bioprinting strategy for  
484 constructing centimeter-scale liver-like tissues with branched perfusable vascular  
485 networks using a model cell-laden hydrogel formed with organoids bearing bioink.  
486 The cell aggregates were deposited in the cell-laden matrix to modulate  
487 morphogenesis in space and time. Besides the bioprinted vasculatures, 3D capillary  
488 networks were formed successfully using vascularized HUVECs, which supported the  
489 nutrient and oxygen requirement of the centimeter-scale liver. We also characterized  
490 the HepG2 cells in the tissue, which displayed increased liver-specific gene  
491 expression, and determined liver functions, such as albumin secretion, 7 days after  
492 differentiation in both *in vitro* and *in vivo* systems. Soft cell-laden elastic hydrogel  
493 was tested *in vivo* by direct surgical anastomosis, which has been rarely reported  
494 earlier. This work provides a viable and rapid design strategy for biofabrication of  
495 engineered tissues, as well as *in vivo* testing using surgical anastomosis for  
496 establishing an active vascular network for optimal transport of blood and tissue  
497 function.

498       The printability and biocompatibility of bioink largely affect the construction of  
499 soft tissues with vascular network.<sup>[49]</sup> High concentrations of polymer to some extent  
500 can strengthen the hydrogel viscosity.<sup>[50]</sup> High viscosity allows extruded bioink to  
501 better hold its shape and improves mechanical stability, which is especially beneficial  
502 in printing larger structures with good resolution.<sup>[51]</sup> However, higher viscosity  
503 increases shear stress during printing, which can damage cells by directly disrupting  
504 cell membranes, thereby reducing the rate of proliferation in the surviving cells.  
505 Furthermore, it is necessary to use low-concentration (i.e. <5%) GelMA for  
506 bioprinting, which can not only achieve higher cell viability after printing, but also  
507 facilitate cell proliferation and migration within the printed structure.<sup>[32]</sup> In the  
508 printing process of low-concentration GelMA, problems may occur, including low  
509 printing resolution, poor shape fidelity, even nonuniform cell distribution and cell  
510 deposition. It's been a heated research topic on the bioprinting of low-concentration  
511 (i.e. <5%) GelMA. Current approaches adapted to tackle the challenge mainly include  
512 the additives of other materials and printing hydrogels under low temperature.<sup>[32, 52]</sup>  
513 Technically speaking, adding other materials is not categorized in the field of  
514 low-concentration bioprinting. What's more, bioprinting hydrogel under low  
515 temperature may be problematic including poor shape fidelity and decreased cell  
516 viability (nearly 90%). Therefore, low-concentration GelMA could achieve fine  
517 bioprinting with enhancing high cell viability, which is a significant research problem  
518 to be resolved. In this study, we used 3% GelMA as cell-laden inks with the secondary  
519 temperature of the BiopHead, which promote high cell viability and printing accuracy.

520 The vasculature is responsible for mass transport which sustains the metabolic  
521 requirements of engineered tissues. Dynamic culture under continuous perfusion  
522 could supply nutrients and oxygen, while removing metabolic wastes through stable  
523 inter-connected vascular networks.<sup>[53-54]</sup> In continuous perfusion culture such as cell  
524 aggregates and organoids, higher cell densities can be sustained.<sup>[20]</sup> Furthermore, this  
525 versatile platform also can be used to precisely control the growth and differentiation  
526 of cultured tissue.<sup>[17]</sup> With addition of appropriate growth factors and culture medium,  
527 perfusion tissue can be stimulated to attain maturity and achieve efficient  
528 functionalization.<sup>[55]</sup>

529

### 530 **3. Conclusions**

531 Three-dimensional printing holds great promise for engineering whole organs,  
532 but the field is still in its nascent stage with many unresolved challenges. In this study,  
533 we demonstrate the use of low concentrations of GelMA with fibrin for the first time,  
534 as a bioink for extrusion-based printing of vascularized tissues, producing model  
535 organ tissues with high-resolution and high cell viability. This 3D engineering-based  
536 methodology has allowed us to fabricate vascular networks in centimeter-scale tissues  
537 with active tissue functionality. Furthermore, it opens a new avenue for fundamental  
538 drug screening studies.

539

---

540 **4. Experimental Section**

541 *GelMA synthesis:* We used a simple method to synthesize GelMA. First, gelatin (Type  
542 A, 300 bloom from porcine skin, Sigma Aldrich) was dissolved in Dulbecco's  
543 phosphate-buffered saline (DPBS, Gibco) to make a 10% (w/v) solution, and stirred at  
544 60°C for 2 h. Then the temperature was lowered to 50°C, and 0.5 ml methacrylic  
545 anhydride (Sigma Aldrich) was slowly added to the gelatin solution with continuous  
546 stirring at a rate of 1 mL min<sup>-1</sup> per gram of gelatin, to obtain 70% modified GelMA.  
547 After 3 hours of reaction, the temperature was reduced to 40°C, and the reaction  
548 solution was dialyzed with deionized water. The molecular weight cut-off of the  
549 dialysis bag was 14 kDa (Spectrum Labs, Inc.). In order to remove excess methacrylic  
550 acid and salts, dialysis was performed at 40°C, and the fluid was changed once a day  
551 for a week. The reaction solution was aliquoted, lyophilized, and stored at -80°C. The  
552 lyophilized powder was stored at -20°C. Pre-heated sterile DPBS at 60°C was used to  
553 dissolve 10% GelMA, and 1 M NaOH was used to adjust the pH to 7.2-7.4. The  
554 methacrylation degree of free amine group in GelMA sample was determined by <sup>1</sup>H  
555 NMR as previously described.<sup>[56]</sup> Before use, 0.1% (w/v) lithium phenyl-2, 4,  
556 6-trimethylbenzoylphosphinate (LAP, Sigma Aldrich) was added.

557 *Bioink preparation:* We prepared several types of inks for 3D printing. Cell-laden inks  
558 were prepared using GelMA and fibrin (Sigma Aldrich, MO, USA) at different  
559 mixing ratios. Fibrinogen was stored at concentration of 25 mg mL<sup>-1</sup> in sterile DPBS  
560 without calcium and magnesium, and kept at 37°C for 30 min to allow full dissolution.

561 Photocrosslinking was achieved by exposing the GelMA or GelMA-Fibrin  
562 prepolymer to  $10 \text{ mW cm}^{-2}$  UV light (365 nm, Goodun) for 2 min.

563 The 10% gelatin-based bioink was used as the sacrificial material, which was  
564 dissolved in pre-heated sterile DPBS at  $60^\circ\text{C}$ , and the pH was adjusted to 7.2-7.4 with  
565 1 M NaOH. A 10% GelMA solution was used as the elastic material for the *in vitro*  
566 perfusion culture. The elastic material used for jugular artery and vein transplantation  
567 was poly(dimethylsiloxane) (PDMS, Sylgard<sup>TM</sup> 184 silicone elastomer kit, Dow  
568 chemical company). This ink is composed of two elastomers in a weight ratio of 10:1,  
569 which were mixed for 30 s at 2000 rpm with a stirring mixer (AE-310, Thinky  
570 Corporation) to make the final solution uniform.

571 *Viscosity test:* A viscometer (RST-CPS cone plate rheometer, Brookfield) was used to  
572 measure the viscosity of 1%, 2%, 3%, 4%, 5% GelMA, and 3% GelMA+0.25%  
573 Fibrin bioink, respectively. First, the temperature of the viscometer measuring plate  
574 with a upper plate diameter of 25 mm was cooled to  $2^\circ\text{C}$ . The GelMA solution was  
575 dropped on the measuring plate, and the distance between the plates was adjusted to  
576  $50 \mu\text{m}$ . The excess material was wiped off and allowed to stand for 1 min. The upper  
577 measuring plate (rotor) was gently rotated before measurement to avoid adhesion  
578 between the plates, and the viscosity was measured at a shear rate of  $10 \text{ s}^{-1}$  with  
579 temperature increase of  $1^\circ\text{C}$  per min.

580 *Morphology and porosity analysis by Scanning Electron Microscopy (SEM):* The  
581 GelMA hydrogel and GelMA-Fibrin hydrogel were immersed in PBS for 24 h at  $37^\circ\text{C}$ .  
582 For studies of internal porosity, samples were fixed with 3.7% paraformaldehyde

583 (PFA, Fluka) for 30 min, immersed in liquid nitrogen for 60 seconds, freeze-fractured  
584 using a cold razor blade, and sublimation at  $-75^{\circ}\text{C}$  for 45min, and then sputter coated  
585 with Au. All samples were observed by HITACHI S-3000N&Quorum PP3000T  
586 Scanning Electron Microscope.

587 *SEM images for hydrogel with cells:* the hydrogel samples with cells were soaked  
588 with 2.5% glutaraldehyde at  $4^{\circ}\text{C}$  for 24 h. Then all samples were washed with PBS for  
589 3 times, and dehydrated samples through graded ethanol solutions with 15, 30, 50, 70,  
590 80, 90, 100, 100% (v/v, in water) for 10 min each time. After that all samples were  
591 dried by a critical point drying (CPD) technique using a Bal-Tec 030 instrument.  
592 Finally, all samples were coated with Au by a sputter and examined with SEM  
593 (phenom pro).

594 *Cell culture and maintenance:* Primary human umbilical vein endothelial cells  
595 (HUVECs) and red fluorescent protein-expressing HUVECs (RFP-HUVECs) were  
596 maintained in EMG-2 medium (complete EGM-2 BulletKit<sup>TM</sup>, Lonza). We obtained  
597 human umbilical cords from Xinhua Hospital Affiliated to Shanghai Jiaotong  
598 University School of Medicine. The collection and use of the obtained umbilical cords  
599 were approved by the institutional ethical committee (approval number:  
600 XHEC-C-2020-092-1), and informed consent was obtained from all participants.

601 HepG2, human foreskin fibroblast (HFFs), and human umbilical cord MSCs were  
602 donated by the National Stem Cell Resource Center, Beijing. HepG2, GFP-HepG2  
603 and HFFs were cultured in Dulbecco's modified Eagle medium containing high  
604 glucose and sodium pyruvate (DMEM, Gibco) supplemented with 10% fetal bovine



605 serum (FBS, Bioind), 1% penicillin/streptomycin (Gibco). MSCs and GFP-MSCs  
606 were cultured in Dulbecco's modified Eagle medium containing high glucose and  
607 sodium pyruvate (DMEM, Gibco) supplemented with 15% fetal bovine serum (FBS,  
608 Bioind), 1% non-essential amino acid solution (NEAA, Gibco), 1% GlutaMAX™  
609 (Gibco), 1% penicillin/streptomycin (Gibco). All cells were cultured at 37°C and 5%  
610 CO<sub>2</sub> in an incubator, and the medium was changed every 2 days. HUVECs,  
611 RFP-HUVECs and HFFs were not used beyond the 10<sup>th</sup> passage.

612 For HUVEC cell aggregate preparation, 8×10<sup>4</sup> HUVECs and 2×10<sup>4</sup> HFFs were  
613 suspended in 1.5 mL medium and seeded into each well of a 24-well Kuraray  
614 ultra-low attachment plate (round-bottom type, Elplasia). Each plate has 400  
615 microwells. Cells supplemented with EGM-2 were seeded evenly in the microwells,  
616 which were then allowed to self-aggregate over a time of 24 h. For HepG2 aggregate  
617 preparation, 6×10<sup>4</sup> HepG2, 3×10<sup>4</sup> HUVECs, and 1×10<sup>4</sup> HFFs were suspended in 1.5  
618 mL medium and seeded in a well. Cells were maintained in EGM-2, and the medium  
619 was changed 2-3 times every day by replacing 1 mL of the supernatant in each well.

620 *Encapsulation of HUVECs and MSCs in hydrogels:* When cells cultured reached 90%  
621 confluency, the culture medium was discarded and cells were washed with PBS, and  
622 then incubated with 0.25% Trypsin-EDTA (Gibco) for 1 min at 37°C to detach the  
623 cells from the culture dishes. The cell suspension was centrifuged at 1200 rpm for 3  
624 min at room temperature. The supernatant was discarded, and the cells were  
625 resuspended in hydrogels at 37 °C. For RFP-HUVECs and GFP-MSCs  
626 co-encapsulation, we mixed 1×10<sup>6</sup> RFP-HUVECs and 1×10<sup>6</sup> GFP-MSCs with 3%

627 GelMA, 3% GelMA+0.25% fibrin, 3% GelMA+1% fibrin, 5% GelMA, 5%  
628 GelMA+0.25% fibrin, respectively. A volume of 20  $\mu$ L of the cell-prepolymer mixture  
629 was dispensed in each well of a 24-well flat bottom cell culture plate.  
630 Photocrosslinking was achieved by exposing the mixture to 10 mW cm<sup>-2</sup> UV light  
631 (365nm, Goodun) for 2 min. The encapsulated hydrogels were then cultured with  
632 EGM-2 medium.

633 *Bioprinting platform and hardware:* A 3D bioprinter developed by the Shenyang  
634 Institute of Automation, Chinese Academy of Sciences, was used for the 3D vascular  
635 tissue printing experiment. The main components of the printer include 5 print heads,  
636 a print platform, and a print bin, which will allow multi-materials printing. As the core  
637 component of the printer, the print head included an integrated electrical interface, a  
638 two-stage temperature control unit, a two-stage temperature sensor, a water-cooling  
639 block, and two printing components (electric extrusion and pneumatic extrusion). The  
640 printing platform can be set at a wide range of temperatures ranging from -10°C to  
641 60°C. The printed 3D vascular network tissue was cured using a low-temperature gel.  
642 The printing chamber has an ultraviolet sterilization function which allows aseptic  
643 printing.

644 *Fabrication process:* The 3D drawing software SolidWorks 2018 (SolidWorks  
645 Software, Inc., La Jolla, USA) was used to model the designed vascular tissue, import  
646 the geometric model into the self-developed software Bipcoder to configure printing  
647 parameters, and generate the G code. For *in vitro* perfusion culturing, 10% gelatin, 3%  
648 GelMA+0.25% fibrin were used as the sacrificial material and the cell-laden material

649 respectively. The feeder needles transfer those inks into the two print heads, and allow  
650 maintenance of the temperature of the printing silo and the printing needle,  
651 respectively. The temperature of the printing silo was set slightly higher (8°C) than  
652 the gel point temperature (6°C), and the temperature of the printing needle was based  
653 on the temperature representing the gel point in the printability map. For  
654 transplantation printing, 10% gelatin, 3% GelMA+0.25% fibrin, and 5% GelMA were  
655 used as the sacrificial material, cell-laden material, and elastic material, respectively,  
656 and loaded into respective print heads. All needles used for printing have a diameter  
657 of 200 μm. Photocrosslinking was achieved using UV light (365nm, Goodun) at the  
658 wavelength of 365 nm for 2 min after printing was completed. Then it is placed in  
659 thrombin solution (5 U mL<sup>-1</sup>) at 37°C to dissolve and remove the internal gelatin  
660 material and allow formation of a vascular channel structure.

661 *Endothelial monolayer and vascular network formation:* The printed structure was  
662 mounted in a customized chamber. We used 10% GelMA to encapsulate the printed  
663 constructs for perfusion. The cells were resuspended to have 1 × 10<sup>7</sup> cells mL<sup>-1</sup> in  
664 EGM-2 medium. To form an endothelial monolayer, 10 μL cell resuspension was  
665 seeded into the channel using a micropipette. Adhesion of the cells to the bottom  
666 surface was allowed for 30 min, followed by flipping of the system and incubation for  
667 30 min to allow adherence to the top surface. After the seeding period, the constructs  
668 were put into the perfusion incubator (TEB500, Ebers) with the tubing inset into the  
669 flow chamber. Unattached cells were washed away with culture medium EGM-2 and

670 5 ng mL<sup>-1</sup> VEGF (R&D). Perfusion rate was set to 2-20  $\mu$ L min<sup>-1</sup>. The constructs were  
671 cultured for several days before further characterizations.

672 *Cell viability assay:* Cell viability was analyzed using LIVE/DEAD  
673 Viability/Cytotoxicity Kit (Life Technologies). After washing the cells three times  
674 with phosphate-buffered saline (PBS), a PBS solution containing 0.5  $\mu$ L mL<sup>-1</sup> calcein  
675 AM and 2  $\mu$ L mL<sup>-1</sup> EthD was used to stain the cells for 20 min in the dark. The cells  
676 were then washed three times with PBS to remove residual reagents. An inverted  
677 confocal microscope was used to take the fluorescence images (Calcein AM: Ex 488  
678 nm, Em 505-525 nm; EthD: Ex 559 nm, Em 600-630 nm).

679 *SD mice and HOs transplantation:* All animal experiments were approved by the  
680 Institutional Animal Care and Use Committee (IACUC) of the Institute of Zoology,  
681 Chinese Academy of Sciences in accordance with institutional and national guidelines  
682 (Ethical approval No. IOZ20180063). To analyze the functionality of vascularized  
683 liver tissues in vivo, we implanted HOs it into subperitoneal of mice after  
684 anaesthetising.

685 *Immunofluorescence staining:* For ALB staining, printed tissues were fixed with 4%  
686 paraformaldehyde for 30 min at room temperature, and permeabilized with 0.5%  
687 Triton X-100 (Sigma) for 30 min, followed by PBS washing (3 times). The tissues  
688 were blocked with 3% bovine serum albumin (BSA) in PBS overnight. Then they  
689 were incubated for 2 days with a primary antibody anti-ALB (R&D, MAB1455-SP,  
690 1:100) in blocking buffer at 4 °C, followed by PBS washing (3 times). The tissues  
691 were then incubated with fluorescence-conjugated secondary antibodies Alexa Fluor

692 488 (Donkey anti-mouse, Invitrogen, A21202, 1:500) diluted in PBS for 2 days in the  
693 dark at 4°C. Finally, the nuclei were stained with Hoechst 33342 (Invitrogen, 1:1000)  
694 for 10 min, followed by three PBS washes.

695 *Real-time quantitative polymerase chain reaction:* Total RNA was extracted from  
696 printed tissues and cells using TRIzol (Invitrogen), following the manufacturer's  
697 instructions. One microgram of RNA was reverse transcribed into cDNA using a  
698 PrimeScript™ RT reagent Kit (TaKaRa, RR037A) in a 20 µl reaction. Real-time  
699 quantitative PCR (qPCR) was performed and analyzed using a CFX96™ real-time  
700 system (Bio-Rad) with TB Green Premix Ex Taq™ (TaKaRa, RR420A). The  
701 expression level of *GAPDH* was used for internal normalization. The details of the  
702 primers for HepG2 and HUVECs have been listed in Supplementary Table 1.

703 *Albumin ELISAs:* To measure ALB secretion, the 3D printed tissues were cultured for  
704 various time periods. Culture supernatants were collected at 24 h after a medium  
705 change and stored at -80°C before analysis. ELISAs were performed using a human  
706 albumin ELISA kit (Abcam, ab179887) according to the manufacturer's instructions.

707 *Imaging and analysis:* Photographs of fabricated tissues were acquired using Leica  
708 SAPO stereo microscopes and high-speed CMOS cameras (PCO. dimax HS, PCO).  
709 Confocal microscopy was performed using a Leica Dmil fluorescent microscope and  
710 a Zeiss LSM 780 fluorescent microscope. Three-dimensional projections were  
711 generated in Imaris (Imaris 9.0.2, Bitplane Scientific Software) and ZEN software  
712 (Zeiss). For cell counting and length calculation, a semi-automated process in Image J  
713 was used.

714 *Statistics*: Data are presented as mean  $\pm$  SD (n=3). The t-test was performed to  
715 determine significant differences using GraphPad Prism 8 (GraphPad Software, Inc.,  
716 La Jolla, USA). The significance levels (p-values) are indicated with asterisks and  
717 specific p-values are provided in each figure legend.

### 718 **Supporting Information**

719 Supporting Information is available from the Wiley Online Library or from the  
720 author.

### 721 **Acknowledgements**

722 Xin Liu, Xinhuan Wang, Lulu Sun, and Liming Zhang contributed equally to this  
723 work. The authors acknowledge funding support from the Strategic Priority Research  
724 Program of Chinese Academy of Sciences, Grant No. XDA16020802, XDA16020803  
725 and XDA16020804, National Key Research and Development Program of China  
726 2018YFE0204403, CAS Pioneer Hundred Talents Program, Y829F11102, the  
727 National Key Research and Development Project under Grant 2020YFB1313100, the  
728 National Natural Science Foundation of China (51875557), the Research Equipment  
729 Development Program of the Chinese Academy of Sciences (YJKYYQ20170042,  
730 YJKYYQ20190045), Foundation of State Key Laboratory of Robotics (2017-Z16),  
731 the China Postdoctoral Science Foundation (2020M670454), and Financial supports  
732 from the State Key Laboratory of Membrane and the State Key Laboratory of  
733 Robotics are also gratefully acknowledged. We thank Mr. Kai Li for technical support  
734 of graphical design and Dr. Ji for grammar revision.

735 **Author Contributions**

736 X. Liu developed the multi-scale vascular tissues, designed and performed  
737 experiments, analyzed data and prepared manuscript. Dr. X. Wang contributed to  
738 GelMA synthesis, polymer characterization, SEM analysis, endothelization and  
739 vascular network formation, subperitoneally transplantation and carotid artery and  
740 jugular vein connection. L. Zhang performed viscosity test, bioprinting parameter  
741 testing, fabrication process. Dr. L. Sun performed HUVECs and MSCs encapsulation  
742 experiments, HUVEC cell aggregate preparation. Dr. H. Wang performed bioprinting  
743 platform and hardware designed. Dr. H. Zhao performed GelMA synthesis. Z. Zhang  
744 performed the HUVECs isolation. Dr. Y. Huang performed polymer characterization.  
745 J. Zhang and B. Song performed perfusion experiments. C. Li performed HUVECs  
746 and MSCs encapsulation experiments. H. Zhang and S. Li performed bioprinting  
747 parameter testing, fabrication process.

748 **Conflict of Interest**

749 The authors declare no conflict of interest.

750 **Date Availability Statement**

751 The data that support the findings of this study are available from the corresponding  
752 author upon reasonable request.

753 **Keywords**

754 3D bioprinting, vasculature, vascularization, perfusion, transplantation.

755 Received: ((will be filled in by the editorial staff))

756 Revised: ((will be filled in by the editorial staff))

757

Published online: ((will be filled in by the editorial staff))

758



759 **References**

- 760 [1] S. V. Murphy, A. Atala, *Nat. Biotechnol.* **2014**, 32, 773.
- 761 [2] Y. S. Zhang, K. Yue, J. Aleman, K. M. Moghaddam, S. M. Bakht, J. Yang, W.  
762 Jia, V. Dell'Erba, P. Assawes, S. R. Shin, M. R. Dokmeci, R. Oklu, A.  
763 Khademhosseini, *Ann. Biomed. Eng.* **2017**, 45, 148.
- 764 [3] L. Moroni, T. Boland, J. A. Burdick, C. De Maria, B. Derby, G. Forgacs, J.  
765 Groll, Q. Li, J. Malda, V. A. Mironov, C. Mota, M. Nakamura, W. Shu, S.  
766 Takeuchi, T. B. F. Woodfield, T. Xu, J. J. Yoo, G. Vozzi, *Trends Biotechnol.*  
767 **2018**, 36, 384.
- 768 [4] T. Gao, G. J. Gillispie, J. S. Copus, A. K. Pr, Y. J. Seol, A. Atala, J. J. Yoo, S. J.  
769 Lee, *Biofabrication* **2018**, 10, 034106.
- 770 [5] P. S. Gungor-Ozkerim, I. Inci, Y. S. Zhang, A. Khademhosseini, M. R.  
771 Dokmeci, *Biomater. Sci.* **2018**, 6, 915.
- 772 [6] Y. S. Zhang, A. Khademhosseini, *Science* **2017**, 356, eaaf3627.
- 773 [7] N. F. Huang, V. Serpooshan, V. B. Morris, N. Sayed, G. Pardon, O. J. Abilez,  
774 K. H. Nakayama, B. L. Pruitt, S. M. Wu, Y. S. Yoon, J. Zhang, J. C. Wu,  
775 *Commun. Biol.* **2018**, 1, 199.
- 776 [8] S. Maharjan, J. Alva, C. Cámara, A. G. Rubio, D. Hernández, C. Delavaux, E.  
777 Correa, M. D. Romo, D. Bonilla, M. L. Santiago, W. Li, F. Cheng, G. Ying, Y.  
778 S. Zhang, *Matter* **2021**, 4, 217.
- 779 [9] D. Richards, J. Jia, M. Yost, R. Markwald, Y. Mei, *Ann. Biomed. Eng.* **2017**,  
780 45, 132.
- 781 [10] C. K. Griffith, C. Miller, R. C. A. Sainson, J. W. Calvert, N. L. Jeon, C. C. W.  
782 Hughes, S. C. George, *Tissue Engineering* **2005**, 11, 257.
- 783 [11] Y. S. Zhang, A. Khademhosseini, in *Tissue-Engineered Vascular Grafts*, DOI:  
784 10.1007/978-3-030-05336-9\_11 **2020**, Ch. Chapter 11, p. 321.
- 785 [12] X. Cao, S. Maharjan, R. Ashfaq, J. Shin, Y. Shrike Zhang, *Engineering* **2020**,  
786 DOI: <https://doi.org/10.1016/j.eng.2020.03.019>.
- 787 [13] P. Datta, B. Ayan, I. T. Ozbolat, *Acta Biomater.* **2017**, 51, 1.
- 788 [14] I. T. Ozbolat, M. Hospodiuk, *Biomaterials* **2016**, 76, 321.
- 789 [15] H. Gudapati, M. Dey, I. Ozbolat, *Biomaterials* **2016**, 102, 20.
- 790 [16] J. S. Miller, K. R. Stevens, M. T. Yang, B. M. Baker, D.-H. T. Nguyen, D. M.

- 791 Cohen, E. Toro, A. A. Chen, P. A. Galie, X. Yu, R. Chaturvedi, S. N. Bhatia, C.  
792 S. Chen, *Nat. Mater.* **2012**, 11, 768.
- 793 [17] D. B. Kolesky, K. A. Homan, M. A. Skylar-Scott, J. A. Lewis, *Proc. Natl.*  
794 *Acad. Sci. USA* **2016**, 113, 3179.
- 795 [18] L. E. Bertassoni, M. Cecconi, V. Manoharan, M. Nikkhah, J. Hjortnaes, A. L.  
796 Cristino, G. Barabaschi, D. Demarchi, M. R. Dokmeci, Y. Yang, A.  
797 Khademhosseini, *Lab on a Chip* **2014**, 14, 2202.
- 798 [19] L. Zhao, V. K. Lee, S.-S. Yoo, G. Dai, X. Intes, *Biomaterials* **2012**, 33, 5325.
- 799 [20] M. A. Skylar-Scott, S. G. Uzel, L. L. Nam, J. H. Ahrens, R. L. Truby, S.  
800 Damaraju, J. A. Lewis, *Sci. adv.* **2019**, 5, eaaw2459.
- 801 [21] B. Trappmann, B. M. Baker, W. J. Polacheck, C. K. Choi, J. A. Burdick, C. S.  
802 Chen, *Nat. Commun.* **2017**, 8, 371.
- 803 [22] T. J. Hinton, Q. Jallerat, R. N. Palchesko, J. H. Park, M. S. Grodzicki, H.-J.  
804 Shue, M. H. Ramadan, A. R. Hudson, A. W. Feinberg, *Sci. Adv.* **2015**, 1,  
805 e1500758.
- 806 [23] H.-H. G. Song, K. M. Park, S. Gerecht, *Adv. Drug Deliv. Rev.* **2014**, 79-80, 19.
- 807 [24] Y. Nashimoto, T. Hayashi, I. Kunita, A. Nakamasu, Y.-s. Torisawa, M.  
808 Nakayama, H. Takigawa-Imamura, H. Kotera, K. Nishiyama, T. Miura, R.  
809 Yokokawa, *Integrative Biology* **2017**, 9, 506.
- 810 [25] I. T. Ozbolat, *Trends Biotechnol.* **2015**, 33, 395.
- 811 [26] J. D. Baranski, R. R. Chaturvedi, K. R. Stevens, J. Eyckmans, B. Carvalho, R.  
812 D. Solorzano, M. T. Yang, J. S. Miller, S. N. Bhatia, C. S. Chen, *Proc. Natl.*  
813 *Acad. Sci. USA* **2013**, 110, 7586.
- 814 [27] X. Ye, L. Lu, M. E. Kolewe, H. Park, B. L. Larson, E. S. Kim, L. E. Freed,  
815 *Biomaterials* **2013**, 34, 10007.
- 816 [28] B. Zhang, M. Montgomery, M. D. Chamberlain, S. Ogawa, A. Korolj, A.  
817 Pahnke, L. A. Wells, S. Masse, J. Kim, L. Reis, A. Momen, S. S. Nunes, A. R.  
818 Wheeler, K. Nanthakumar, G. Keller, M. V. Sefton, M. Radisic, *Nat. Mater.*  
819 **2016**, 15, 669.
- 820 [29] I. S. Kinstlinger, S. H. Saxton, G. A. Calderon, K. V. Ruiz, D. R. Yalacki, P. R.  
821 Deme, J. E. Rosenkrantz, J. D. Louis-Rosenberg, F. Johansson, K. D. Janson,  
822 D. W. Sazer, S. S. Panchavati, K.-D. Bissig, K. R. Stevens, J. S. Miller, *Nat.*

- 823 *Biomed. Eng.* **2020**, 4, 916.
- 824 [30] C. Colosi, S. R. Shin, V. Manoharan, S. Massa, M. Costantini, A. Barbetta, M.  
825 R. Dokmeci, M. Dentini, A. Khademhosseini, *Adv. Mater.* **2016**, 28, 677.
- 826 [31] J. Yin, M. Yan, Y. Wang, J. Fu, H. Suo, *ACS Appl. Mater. Interfaces* **2018**, 10,  
827 6849.
- 828 [32] W. Liu, M. A. Heinrich, Y. Zhou, A. Akpek, N. Hu, X. Liu, X. Guan, Z. Zhong,  
829 X. Jin, A. Khademhosseini, Y. S. Zhang, *Adv. Healthc. Mater.* **2017**, 6.
- 830 [33] A. I. Van Den Bulcke, B. Bogdanov, N. De Rooze, E. H. Schacht, M.  
831 Cornelissen, H. Berghmans, *Biomacromolecules* **2000**, 1, 31.
- 832 [34] J. W. Nichol, S. T. Koshy, H. Bae, C. M. Hwang, S. Yamanlar, A.  
833 Khademhosseini, *Biomaterials* **2010**, 31, 5536.
- 834 [35] M. Nikkhah, N. Eshak, P. Zorlutuna, N. Annabi, M. Castello, K. Kim, A.  
835 Dolatshahi-Pirouz, F. Edalat, H. Bae, Y. Yang, A. Khademhosseini,  
836 *Biomaterials* **2012**, 33, 9009.
- 837 [36] Y.-C. Chen, R.-Z. Lin, H. Qi, Y. Yang, H. Bae, J. M. Melero-Martin, A.  
838 Khademhosseini, *Adv. Funct. Mater.* **2012**, 22, 2027.
- 839 [37] D. B. Kolesky, R. L. Truby, A. S. Gladman, T. A. Busbee, K. A. Homan, J. A.  
840 Lewis, *Adv. Mater.* **2014**, 26, 3124.
- 841 [38] W. Jia, P. S. Gungor-Ozkerim, Y. S. Zhang, K. Yue, K. Zhu, W. Liu, Q. Pi, B.  
842 Byambaa, M. R. Dokmeci, S. R. Shin, A. Khademhosseini, *Biomaterials* **2016**,  
843 106, 58.
- 844 [39] R. R. Rao, A. W. Peterson, J. Ceccarelli, A. J. Putnam, J. P. Stegemann,  
845 *Angiogenesis* **2012**, 15, 253.
- 846 [40] G. A. Calderon, P. Thai, C. W. Hsu, B. Grigoryan, S. M. Gibson, M. E.  
847 Dickinson, J. S. Miller, *Biomater. Sci.* **2017**, 5, 1652.
- 848 [41] A. P. Dhand, J. H. Galarraga, J. A. Burdick, *Trends Biotechnol.* **2020**, DOI:  
849 <https://doi.org/10.1016/j.tibtech.2020.08.007>.
- 850 [42] A. C. Daly, M. D. Davidson, J. A. Burdick, *Nat. Commun.* **2021**, 12, 753.
- 851 [43] D. J. Richards, Y. Li, C. M. Kerr, J. Yao, G. C. Beeson, R. C. Coyle, X. Chen,  
852 J. Jia, B. Damon, R. Wilson, E. Starr Hazard, G. Hardiman, D. R. Menick, C.  
853 C. Beeson, H. Yao, T. Ye, Y. Mei, *Nat. Biomed. Eng.* **2020**, 4, 446.
- 854 [44] M.-O. Lee, K. B. Jung, S.-J. Jo, S.-A. Hyun, K.-S. Moon, J.-W. Seo, S.-H.

- 855 Kim, M.-Y. Son, *Journal of Biological Engineering* **2019**, 13, 15.
- 856 [45] Q. Tan, K. M. Choi, D. Sicard, D. J. Tschumperlin, *Biomaterials* **2017**, 113,  
857 118.
- 858 [46] H. Jeon, K. Kang, S. A. Park, W. D. Kim, S. S. Paik, S.-H. Lee, J. Jeong, D.  
859 Choi, *Gut Liver* **2017**, 11, 121.
- 860 [47] T. Billiet, E. Gevaert, T. De Schryver, M. Cornelissen, P. Dubruel,  
861 *Biomaterials* **2014**, 35, 49.
- 862 [48] C.-A. E. Suurmond, S. Lasli, F. W. van den Dolder, A. Ung, H.-J. Kim, P.  
863 Bandaru, K. Lee, H.-J. Cho, S. Ahadian, N. Ashammakhi, M. R. Dokmeci, J.  
864 Lee, A. Khademhosseini, *Adv. Healthc. Mater.* **2019**, 8, 1901379.
- 865 [49] A. Panwar, L. P. Tan, *Molecules* **2016**, 21.
- 866 [50] V. H. Mouser, F. P. Melchels, J. Visser, W. J. Dhert, D. Gawlitta, J. Malda,  
867 *Biofabrication* **2016**, 8, 035003.
- 868 [51] N. Paxton, W. Smolan, T. Bock, F. Melchels, J. Groll, T. Jungst, *Biofabrication*  
869 **2017**, 9, 044107.
- 870 [52] J. Yin, M. Yan, Y. Wang, J. Fu, H. Suo, *ACS Appl. Mater. Interfaces* **2018**, 10,  
871 6849.
- 872 [53] M. Radisic, J. Malda, E. Epping, W. Geng, R. Langer, G. Vunjak-Novakovic,  
873 *Biotechnol. Bioeng.* **2006**, 93, 332.
- 874 [54] A. Tocchio, M. Tamplenizza, F. Martello, I. Gerges, E. Rossi, S. Argenti, S.  
875 Rodighiero, W. Zhao, P. Milani, C. Lenardi, *Biomaterials* **2015**, 45, 124.
- 876 [55] S. Alimperti, T. Mirabella, V. Bajaj, W. Polacheck, D. M. Pirone, J. Duffield, J.  
877 Eyckmans, R. K. Assoian, C. S. Chen, *Proc. Natl. Acad. Sci. USA* **2017**, 114,  
878 8758.
- 879 [56] D. Wei, W. Xiao, J. Sun, M. Zhong, L. Guo, H. Fan, X. Zhang, *J Mater. Chem.*  
880 *B* **2015**, 3, 2753.
- 881

882 **The Table of Contents:**

883 The 3D printing engineering method reported in this article fabricated  
884 centimeter-scale vascularized soft tissues with high viability and accuracy using  
885 multi-materials bioprinting. It allowed us to fabricate vascular networks in  
886 centimeter-scale hepatic tissues with active tissue functionality *in vitro* and *in vivo*,  
887 which will potentially provide a model for fundamental drug screening studies.

888

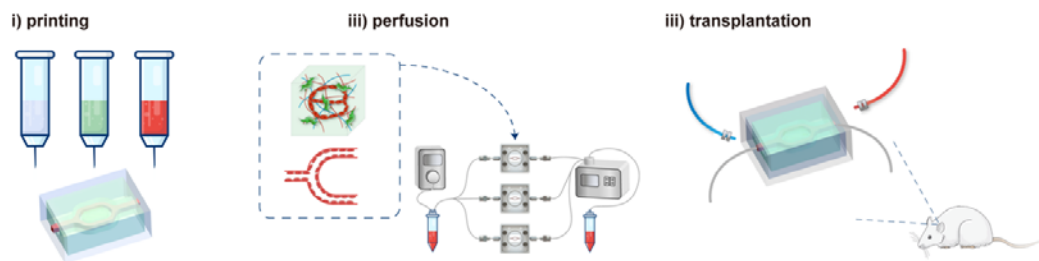

Source: https://www.biorxiv.org/content/10.1101/2021.03.21.436268v1.full.pdf
